# Supplementary material
Source: PubMed Central journal article supplement (PMC2668586)
Supplement: 125_2007_905_MOESM1_ESM.pdf [file 125_2007_905_MOESM1_ESM.pdf]

**Electronic supplementary material**

**ESM Table 1** Spearman rank correlation coefficients between inflammatory markers and risk factors in men and women

|                                                      | Men         |            | Women       |            |
|------------------------------------------------------|-------------|------------|-------------|------------|
|                                                      | Sialic acid | Fibrinogen | Sialic acid | Fibrinogen |
| Age (years)                                          | 0.07        | 0.19***    | -0.07       | 0.01       |
| Diabetes duration (years)                            | 0.17***     | 0.11**     | 0.08        | 0.03       |
| HbA <sub>1c</sub> (%)                                | 0.23***     | 0.11**     | 0.16***     | 0.20***    |
| Insulin dose (U day <sup>-1</sup> kg <sup>-1</sup> ) | 0.06        | -0.06      | 0.09*       | 0.08*      |
| Cholesterol (mmol/l)                                 | 0.29***     | 0.22***    | 0.26***     | 0.15***    |
| LDL-cholesterol (mmol/l)                             | 0.24***     | 0.20***    | 0.12*       | 0.15**     |
| HDL-cholesterol (mmol/l)                             | -0.08*      | -0.12***   | -0.06       | -0.03      |
| Fasting triacylglycerol (mmol/l)                     | 0.34***     | 0.18***    | 0.30***     | 0.16***    |
| Non-HDL-cholesterol (mmol/l)                         | 0.30***     | 0.25***    | 0.27***     | 0.17***    |
| Waist circumference (cm)                             | 0.16***     | 0.21***    | 0.10*       | 0.13***    |
| WHR                                                  | 0.25***     | 0.14***    | 0.11*       | 0.10**     |
| BMI (kg/m <sup>2</sup> )                             | 0.06        | 0.19***    | 0.07        | 0.10**     |
| Systolic BP (mmHg)                                   | 0.06        | 0.14***    | 0.10*       | 0.05       |
| Diastolic BP (mmHg)                                  | 0.06        | 0.14***    | 0.15***     | 0.07*      |
| AER (µg/min)                                         | 0.24***     | 0.16***    | 0.17***     | 0.12***    |

\* $p < 0.05$ , \*\* $p \leq 0.01$ , \*\*\* $p \leq 0.001$
