# Supplementary material
Source: PubMed Central journal article supplement (PMC2668586)
Supplement: 125_2007_905_MOESM2_ESM.pdf [file 125_2007_905_MOESM2_ESM.pdf]

## **Electronic supplementary material**

### **The EURODIAB Prospective Complications Study Group**

B. Karamanos, A. Kofinis, K. Petrou, Hippokration Hospital, Athens, Greece

F. Giorgino, G. Picca, A. Angarano, G. De Pergola, L. Laviola, R. Giorgino, Internal Medicine, Endocrinology and Metabolic Diseases, Department of Emergency and Organ Transplantation, University of Bari, Bari, Italy

C. Ionescu-Tirgoviste, A. Coszma, C. Guja, Clinic of Diabetes, Nutrition and Metabolic Diseases, Bucharest, Romania

M. Songini, A. Casu, M. Pedron, S. Pintus, M. Fossarello, Diabetes Unit Ospedale San Michele, Cagliari, Italy

J. B. Ferriss, G. Grealy, D. O'Keefe, Cork University Hospital, Cork, Ireland

M. Toeller, C. Arden, Diabetes Research Institute, Heinrich-Heine University, Duesseldorf, Germany

R. Rottiers, C. Tuytens, H. Priem, University Hospital of Gent, Belgium

P. Ebeling, M. Kylliäinen, V. A. Koivisto, University Hospital of Helsinki, Finland

B. Idzior-Walus, J. Sieradzki, K. Cyganek, B. Solnica, Department of Metabolic Diseases, Jagiellonian University, Krakow, Poland

H. H. P. J. Lemkes, J. C. Lemkes-Stuffken, Leiden University Medical Centre, the Netherlands

J. Nunes-Correa, M. C. Rogado, L. Gardete-Correia, M. C. Cardoso, A. Silva, J. Boavida, M. Machado Sa Marques, Portuguese Diabetic Association, Lisbon, Portugal

G. Michel, R. Wirion, S. Cardillo, Centre Hospitalier, Luxembourg

G. Pozza, R. Mangili, V. Asnagli, Ospedale San Raffaele, Milan, Italy

E. Standl, B. Schaffler, H. Brand, A. Harms, City Hospital Schwabing, Munich, Germany

D. Ben Soussan, O. Verier-Mine, P. Fallas, M. C. Fallas, Centre Hospitalier de Valenciennes, France

J. H. Fuller, J. Holloway, L. Asbury, D. J. Betteridge, University College London, UK

G. Cathelineau, A. Bouallouche, B. Villatte Cathelineau, Hospital Saint-Louis, Paris, France

F. Santeusano, G. Rosi, V. D'Alessandro, C. Cagini, P. Bottini, G. P. Reboldi, Dipartimento di Medicina Interna, Perugia, Italy

R. Navalesi, G. Penno, S. Bandinelli, R. Miccoli, M. Nannipieri, Dipartimento di Endocrinologia e Metabolismo, Pisa, Italy

G. Ghirlanda, C. Saponara, P. Cotroneo, A. Manto, A. Minnella, Università Cattolica del Sacro Cuore, Rome, Italy

J. D. Ward, S. Tesfaye, S. Eaton, C. Mody, Royal Hallamshire Hospital, Sheffield, UK

M. Borra, P. Cavallo Perin, S. Giunti, G. Grassi, G. F. Pagano, M. Porta, R. Sivieri, F. Vitelli, M. Veglio, Dipartimento di Medicina Interna, Università di Torino and ASO CTO/CRF/Maria Adelaide, Turin, Italy

N. Papazoglou, G. Manes, General Hospital Papageorgiou, Diabetes Unit, Thessaloniki, Greece

M. Muggeo, M. Iagulli, V. Cacciatori, V. Cattedra di Malattie del Metabolismo, Verona, Italy

K. Irsigler, H. Abrahamian, Hospital Vienna Lainz, Austria

S. Walford, J. Sinclair, S. Hughes, V. McLelland, J. Ward, New Cross Hospital, Wolverhampton, UK

G. Roglic, Z. Metelko, Z. R. Pepeonik, Vuk Vrhovac Institute for Diabetes, Zagreb, Croatia

#### **Steering committee members**

J. H. Fuller (London), B. Karamanos, Chairman (Athens), A.-K. Sjolie (Odense), N. Chaturvedi (London), M. Toeller (Duesseldorf), G. Pozza Co-chairman (Milan), B. Ferriss (Cork), M. Porta (Turin), R. Rottiers (Gent), G. Michel (Luxembourg)

#### **Co-ordinating centre**

J. H. Fuller, N. Chaturvedi, J. Holloway, D. Webb, L. Asbury, University College London, UK

#### **Central laboratories**

G.-C. Viberti, R. Swaminathan, P. Lumb, A. Collins, S. Sankaralingham, M.A. Crook, Guy's and St Thomas Hospital, London, UK

#### **Retinopathy Grading Centre**

S. Aldington, T. Mortemore, H. Lipinski, Royal Postgraduate Medical School of Imperial College London, London, UK
